# Supplementary material
Source: PubMed Central journal article supplement (PMC6130916)
Supplement: NIHMS1502830-supplement-6.pdf [file NIHMS1502830-supplement-6.pdf]

# Figure S6

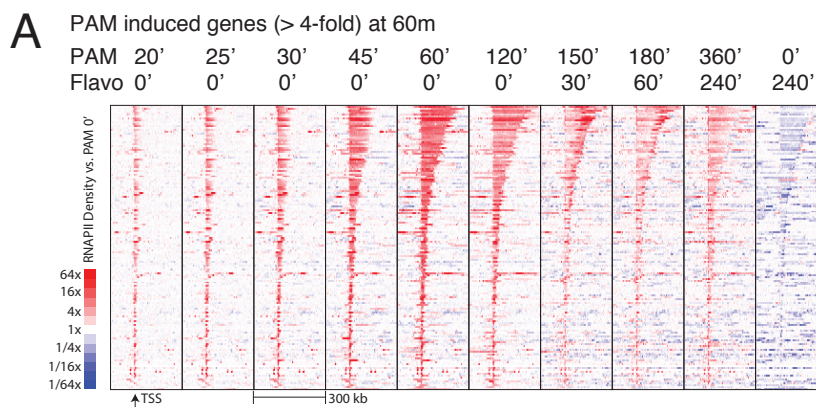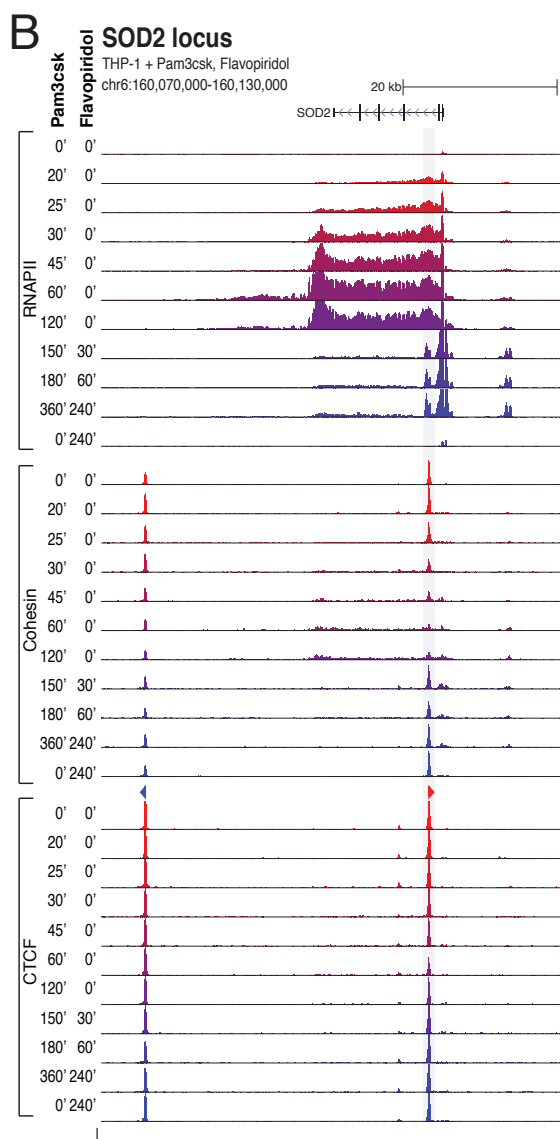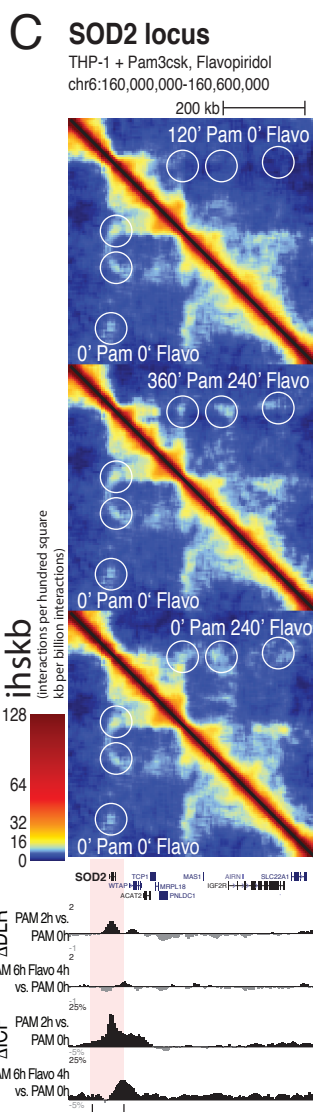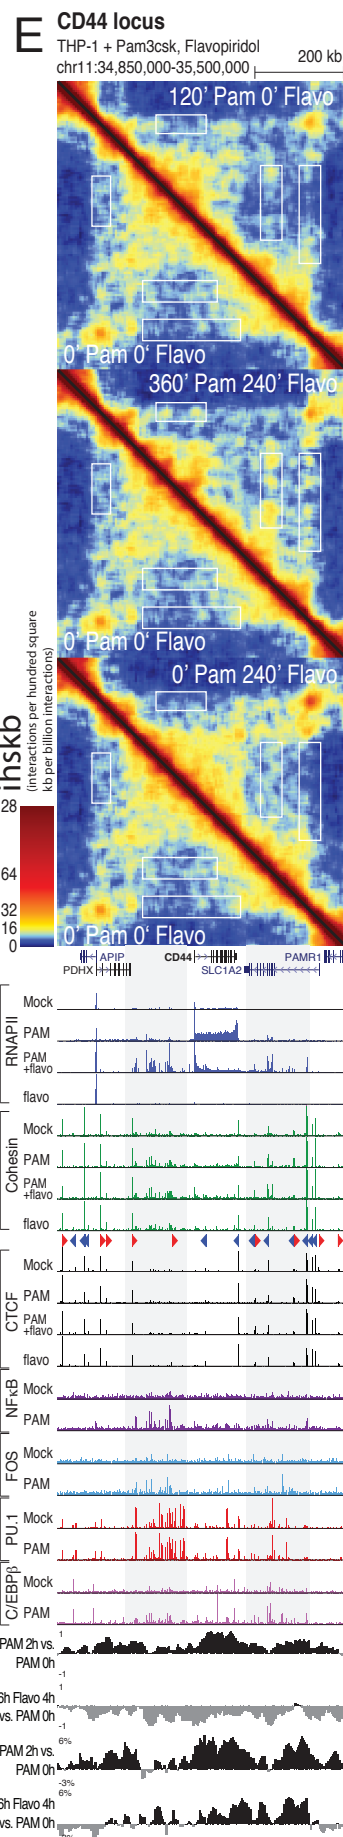

**D**

| de novo Motif | Score             | Match | % bound by ChIP-seq |
|---------------|-------------------|-------|---------------------|
|               | 10 <sup>-33</sup> | NFκB  | 65.2% (NFκB p65)    |
|               | 10 <sup>-31</sup> | PU.1  | 60.4% (PU.1)        |
|               | 10 <sup>-28</sup> | AP1   | 19.3% (FOS)         |
|               | 10 <sup>-22</sup> | C/EBP | 60.6% (C/EBPβ)      |
