# Supplementary material
Source: PubMed Central journal article supplement (PMC6130916)

# Figure S1

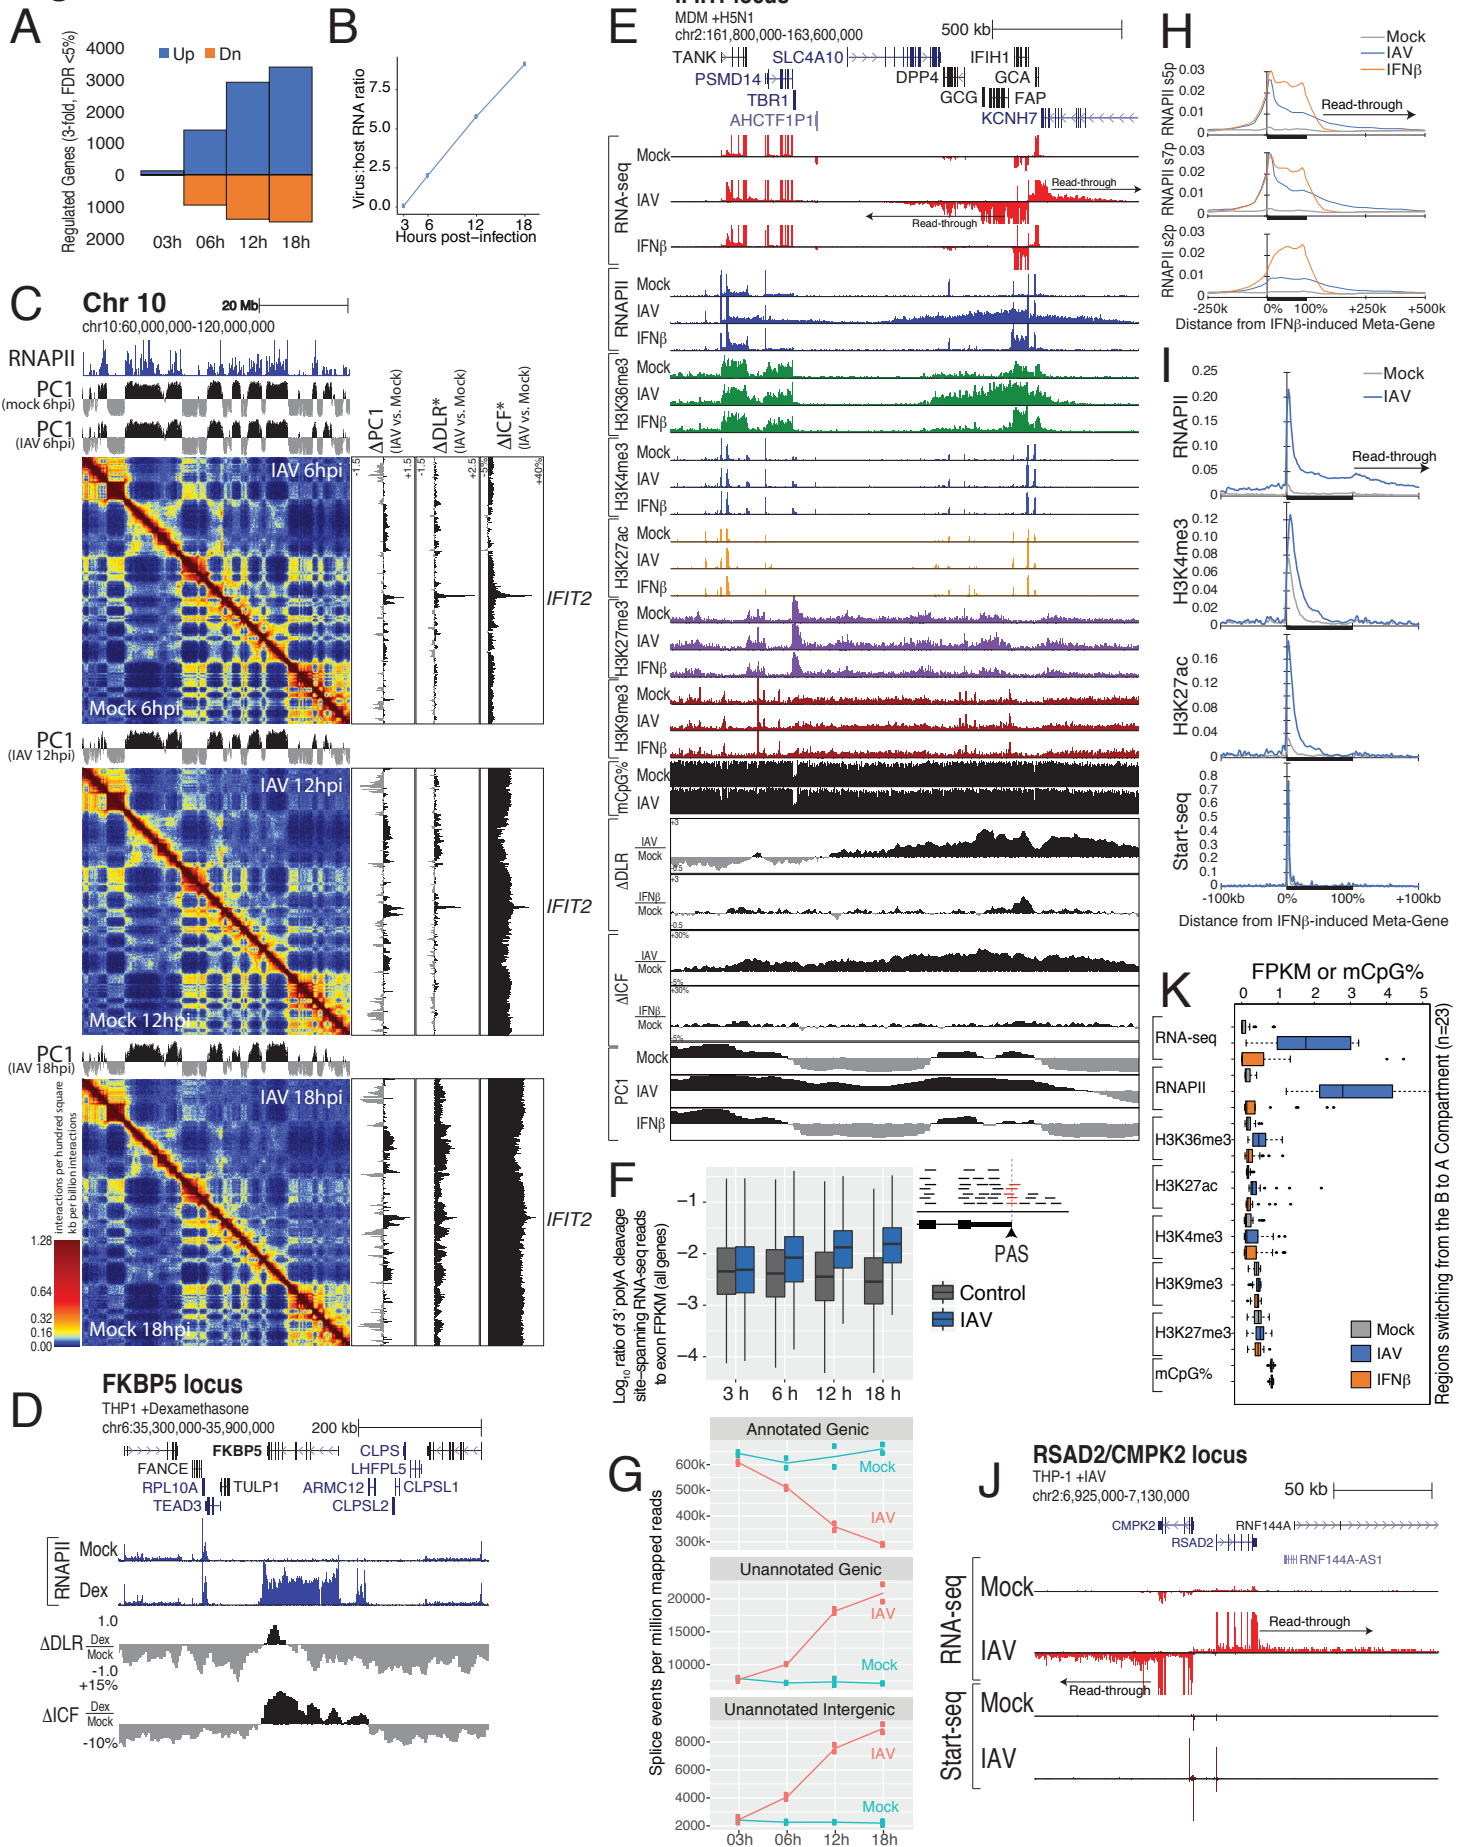

Supplement: NIHMS1502830-supplement-1.pdf [file NIHMS1502830-supplement-1.pdf]

# Figure S2

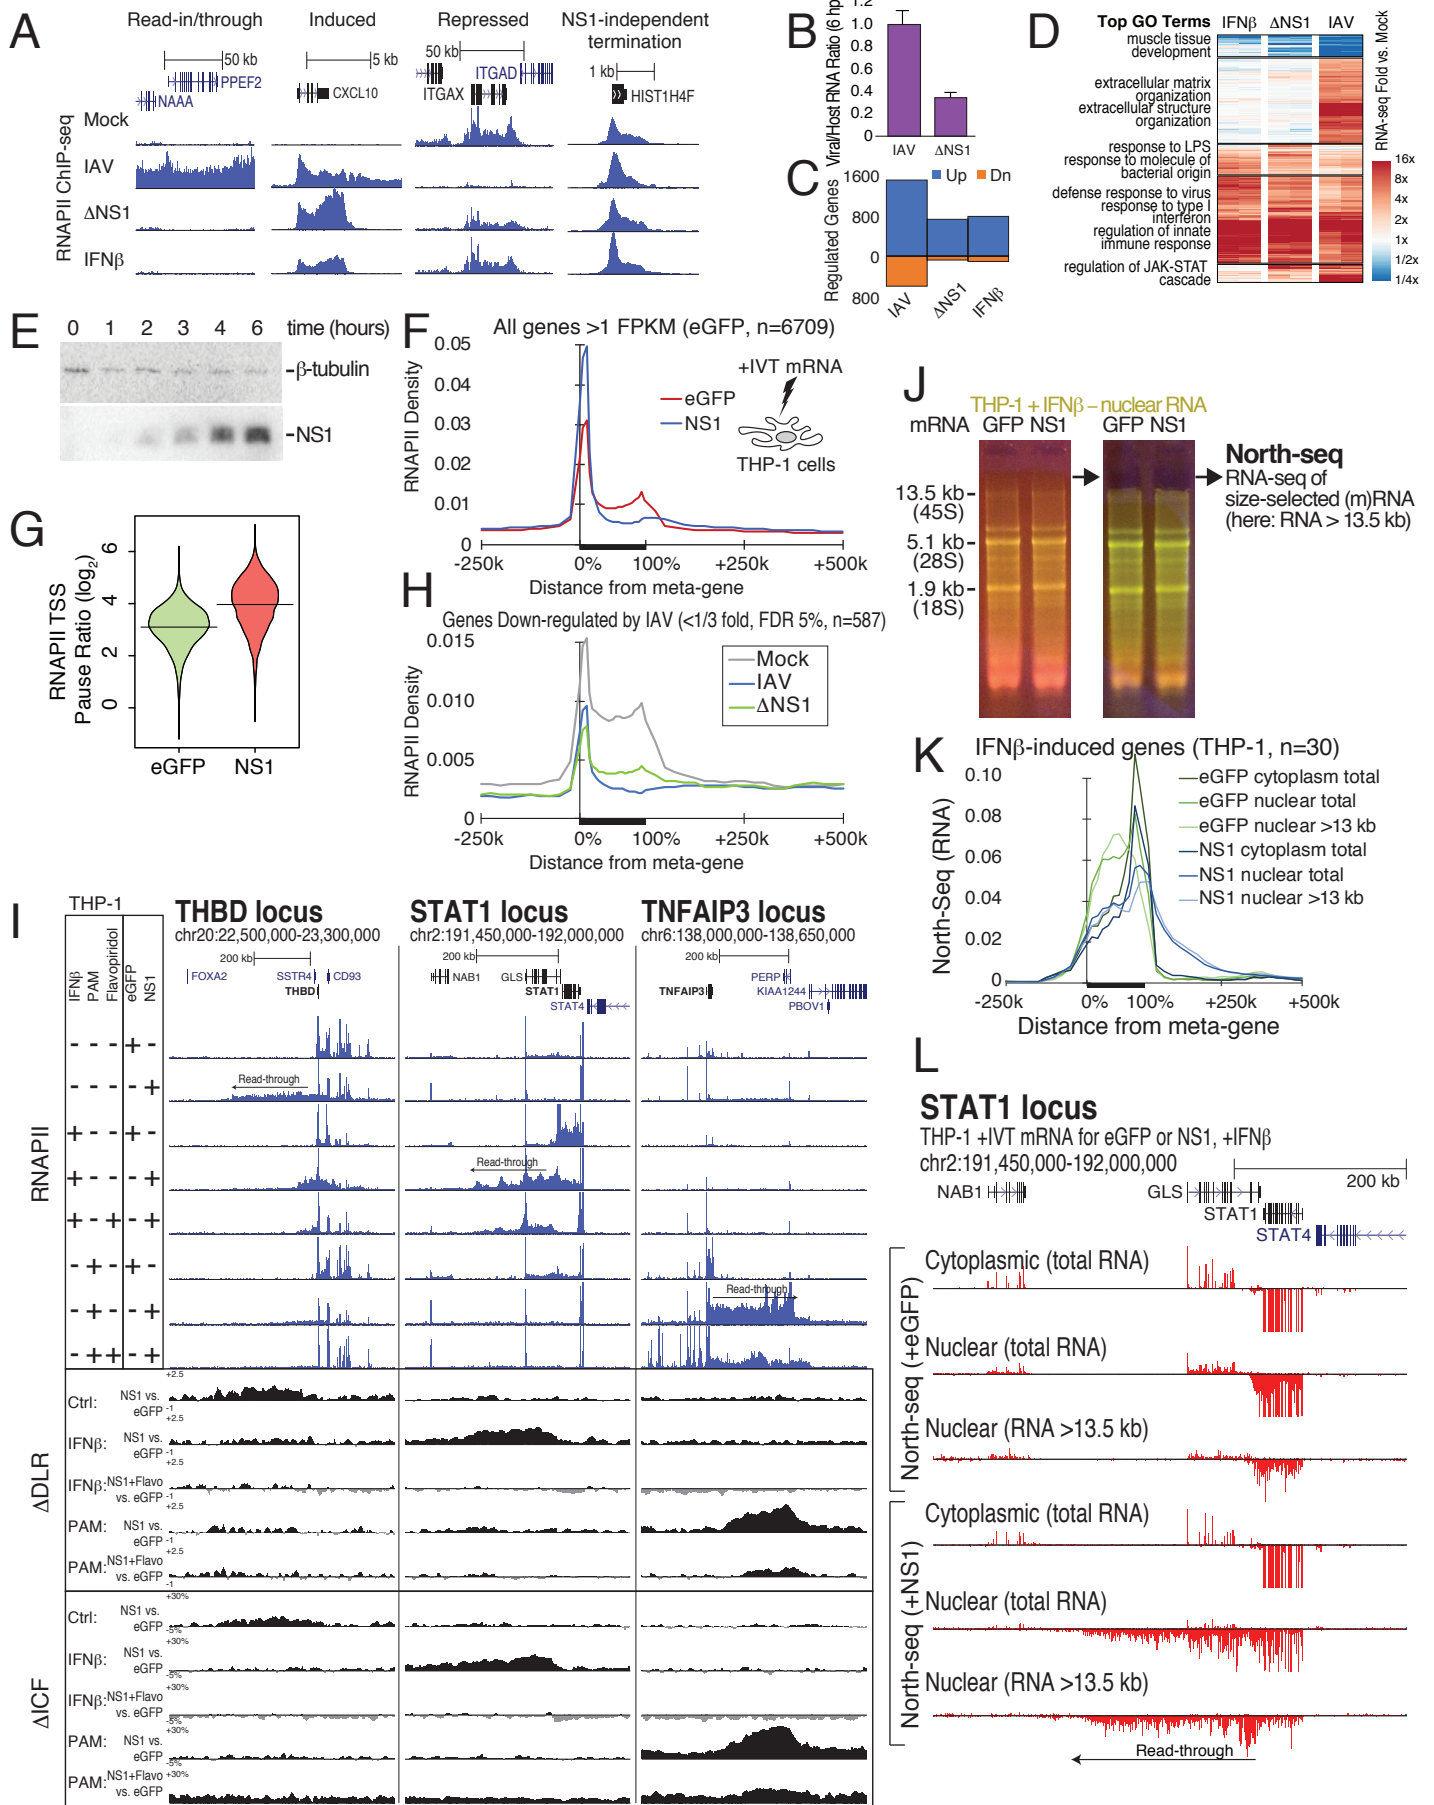

Supplement: NIHMS1502830-supplement-2.pdf [file NIHMS1502830-supplement-2.pdf]

# Figure S3

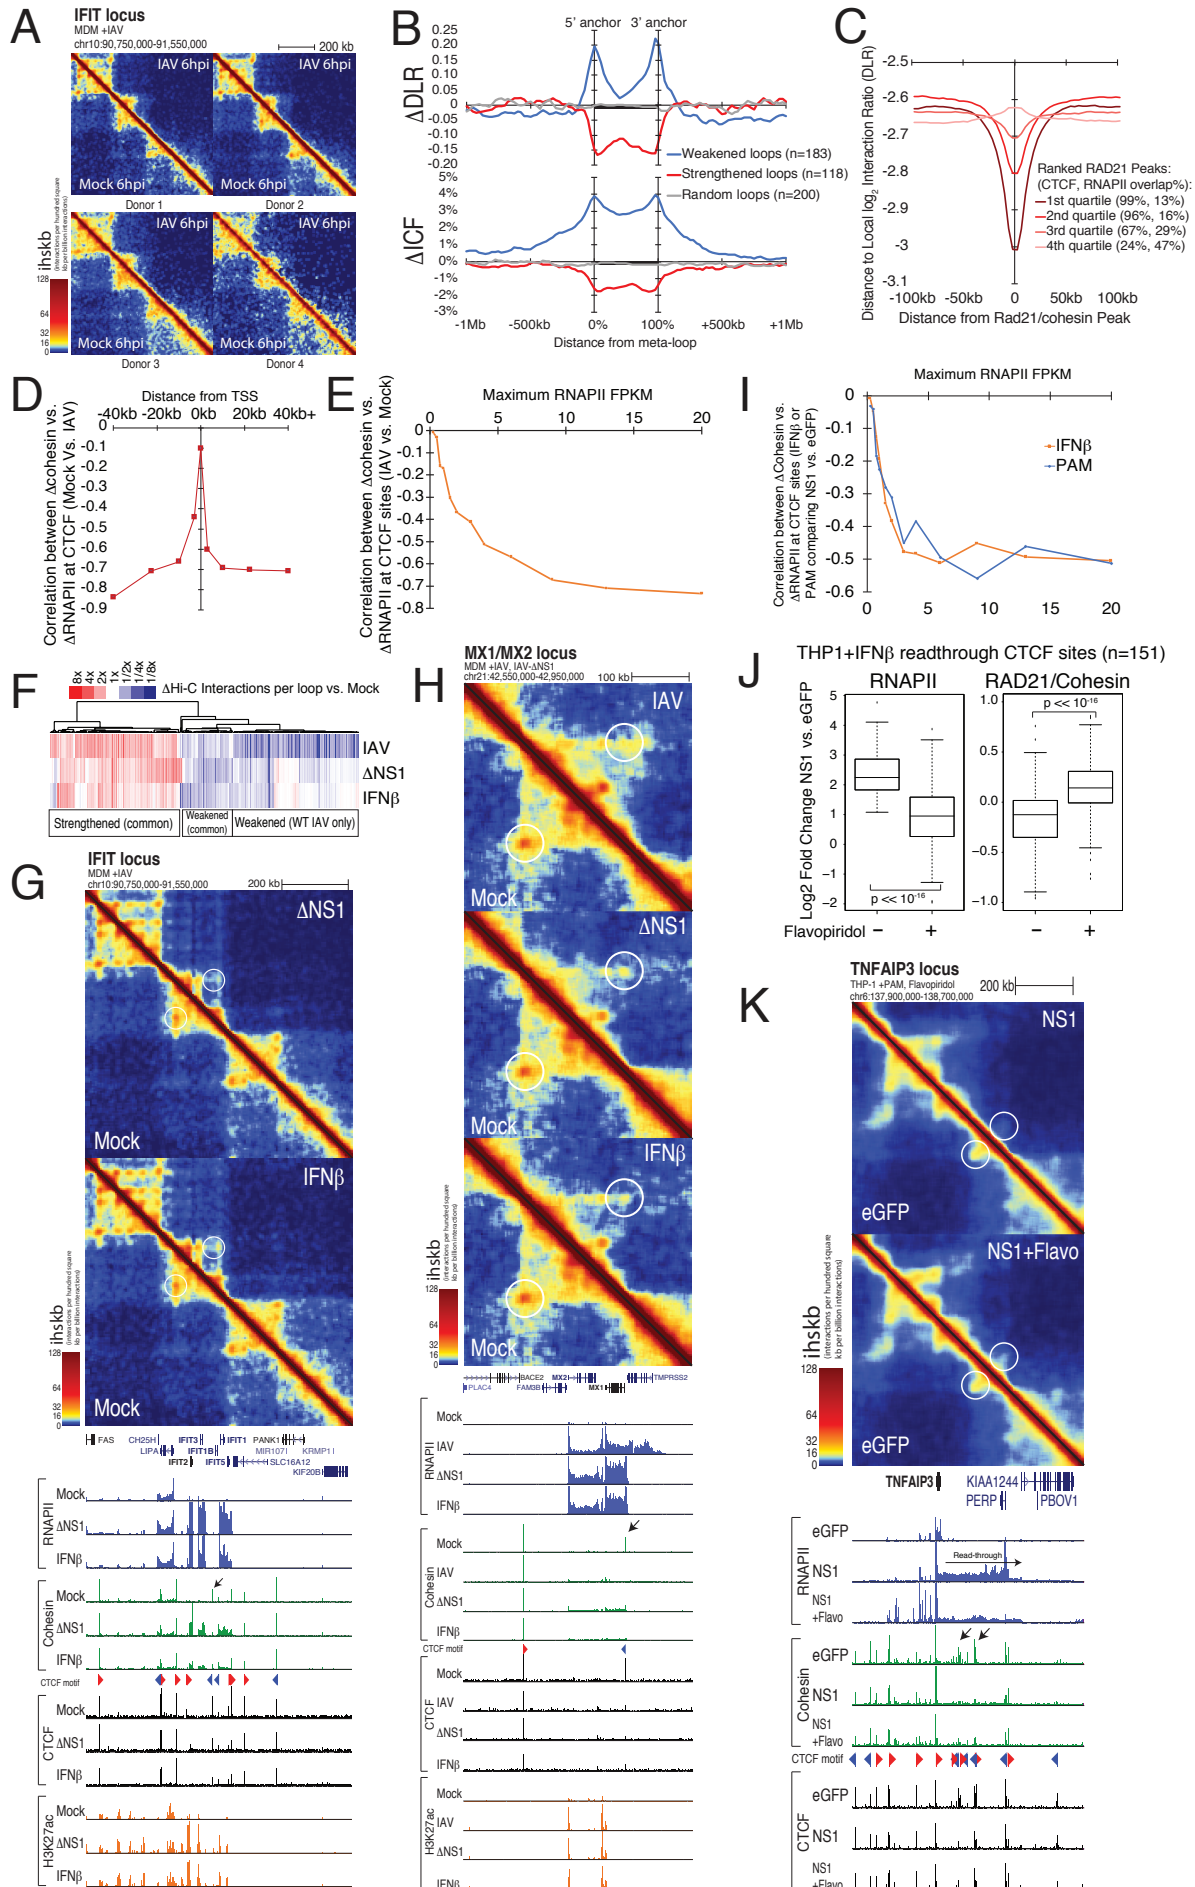

Supplement: NIHMS1502830-supplement-3.pdf [file NIHMS1502830-supplement-3.pdf]

# Figure S4

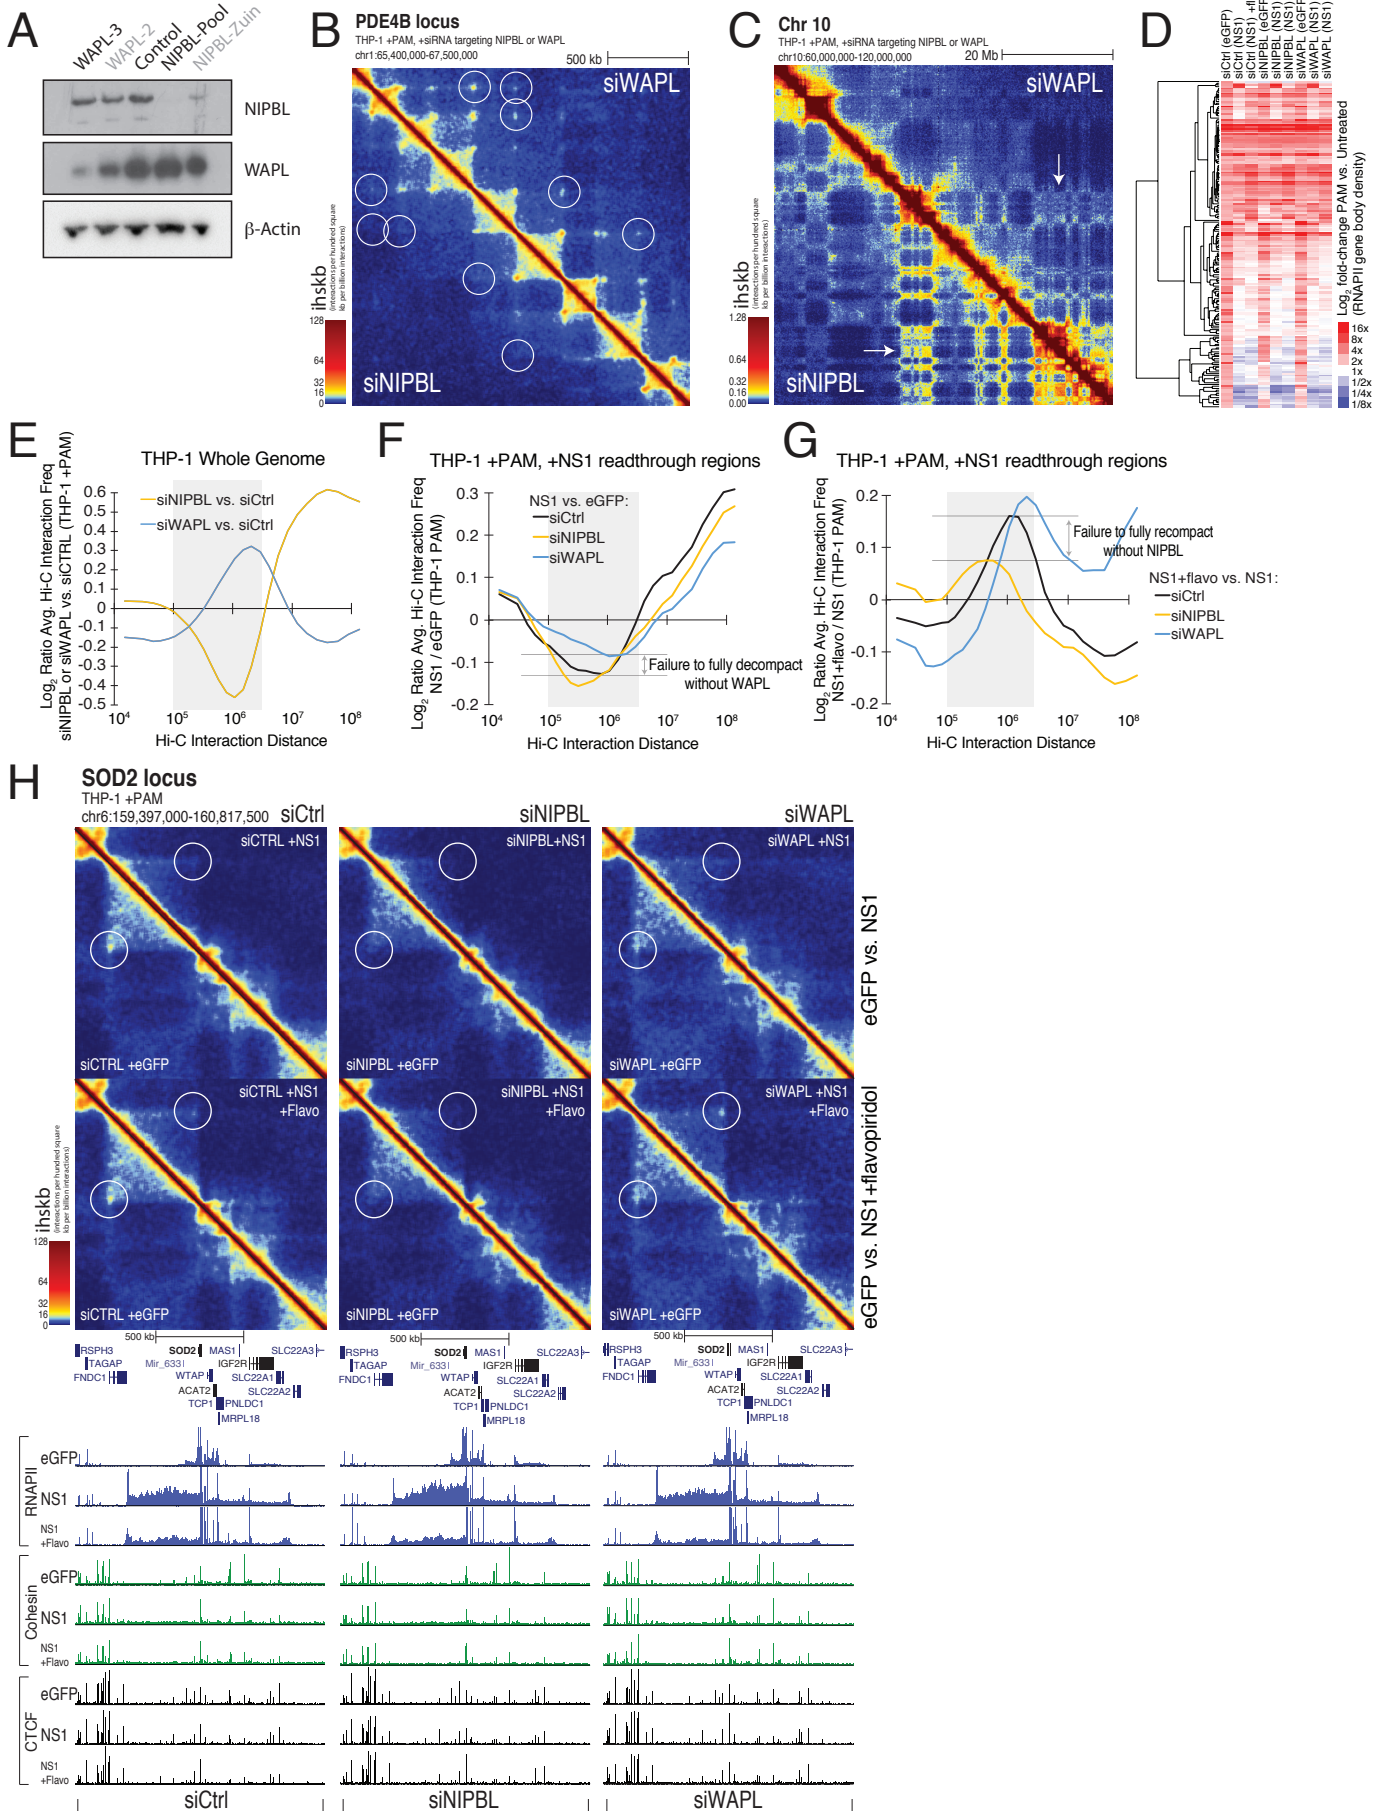

Supplement: NIHMS1502830-supplement-4.pdf [file NIHMS1502830-supplement-4.pdf]

Figure S5

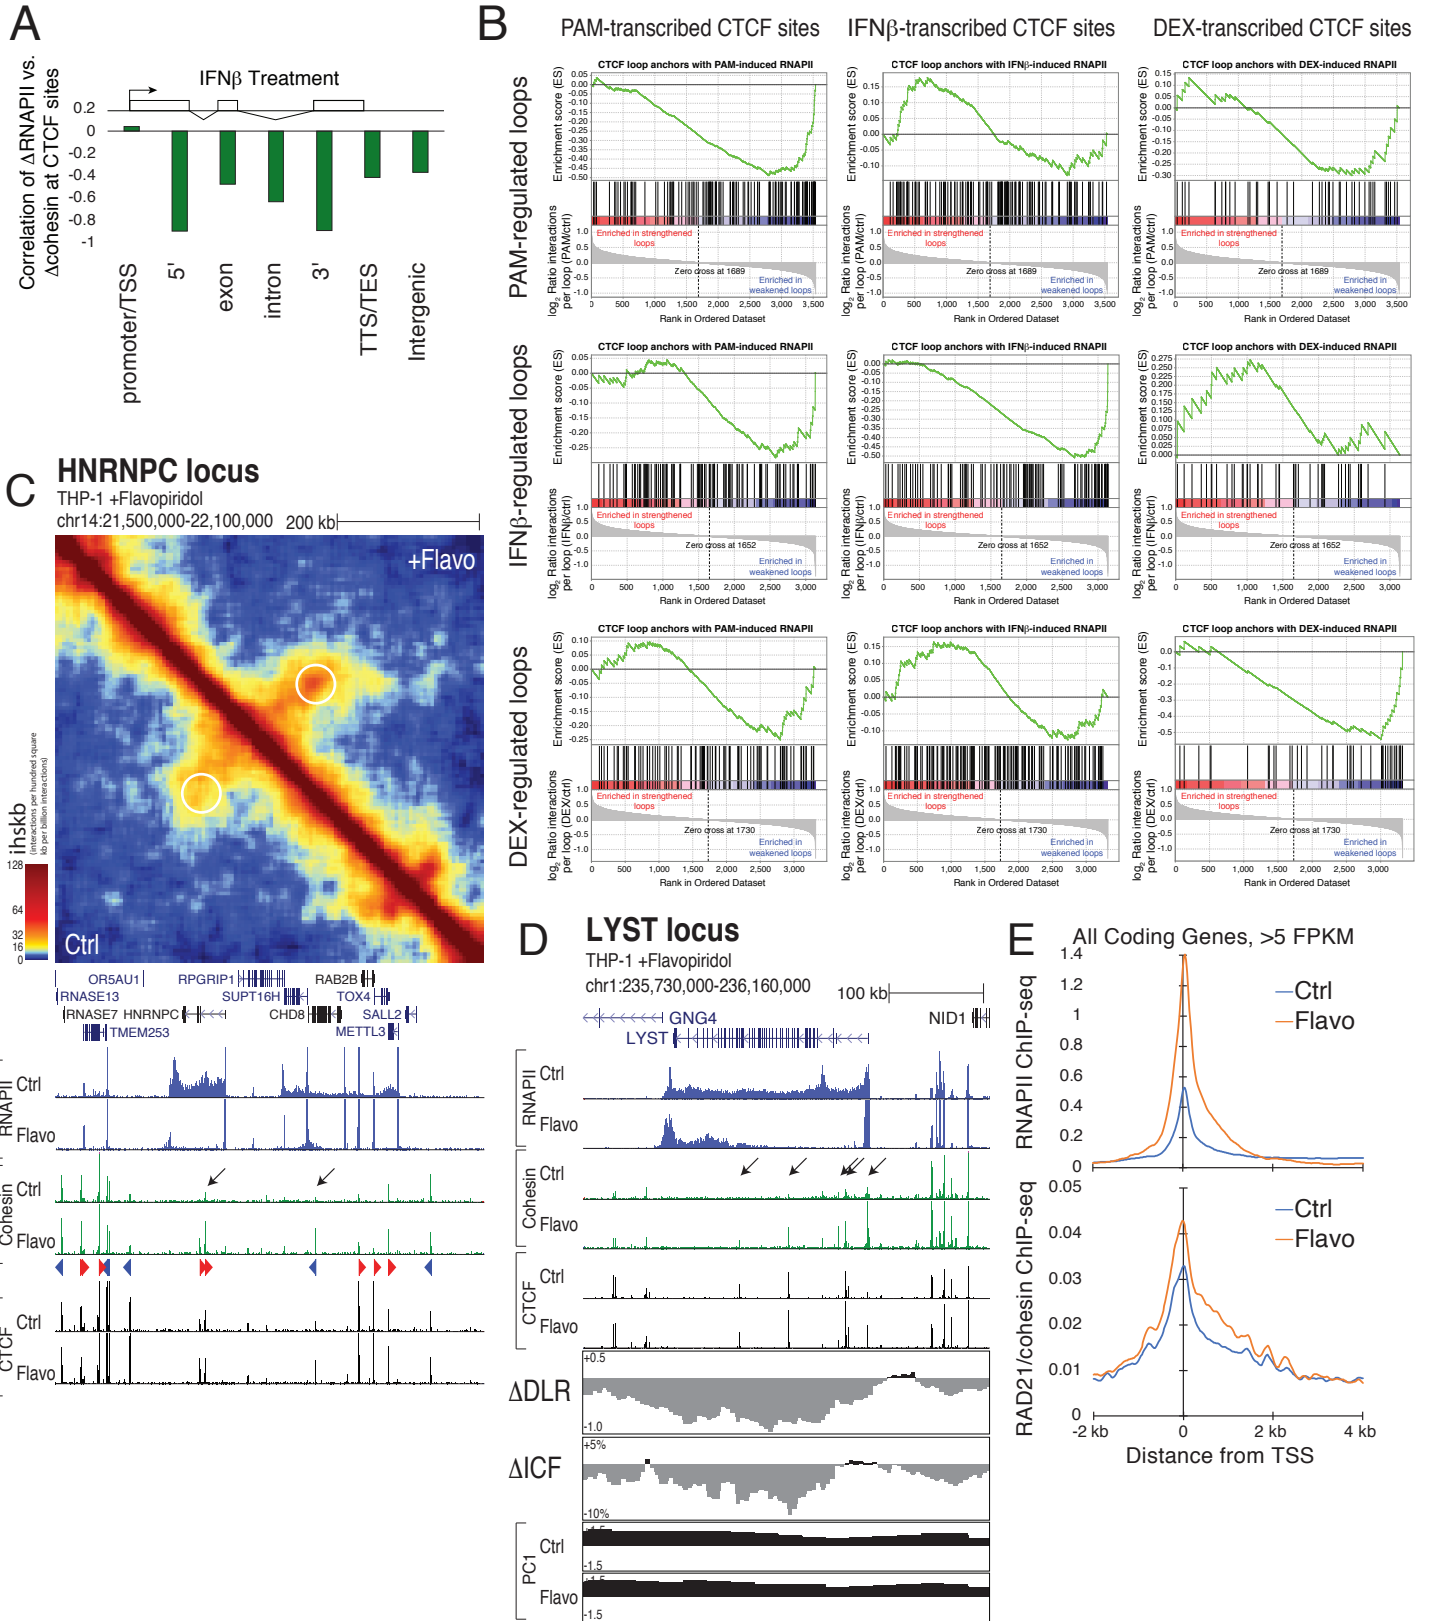

Supplement: NIHMS1502830-supplement-5.pdf [file NIHMS1502830-supplement-5.pdf]

Figure S7

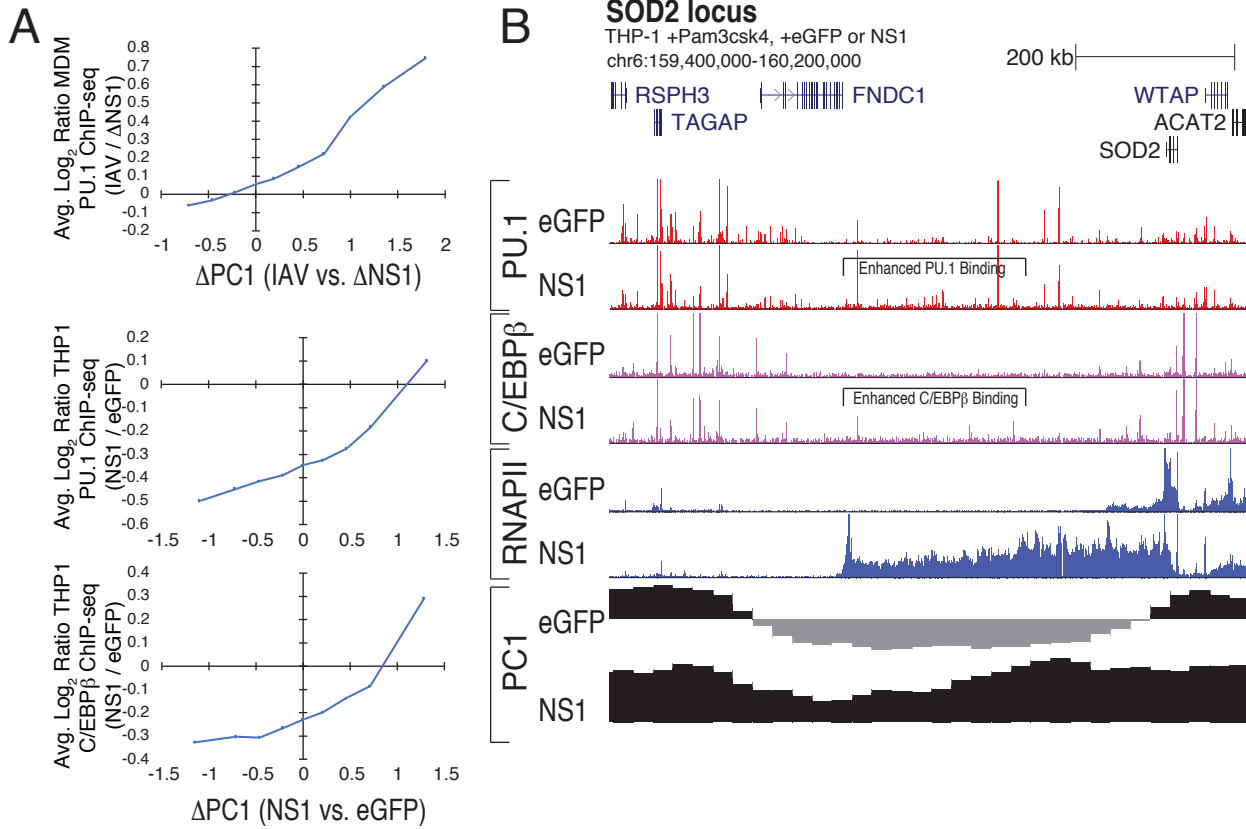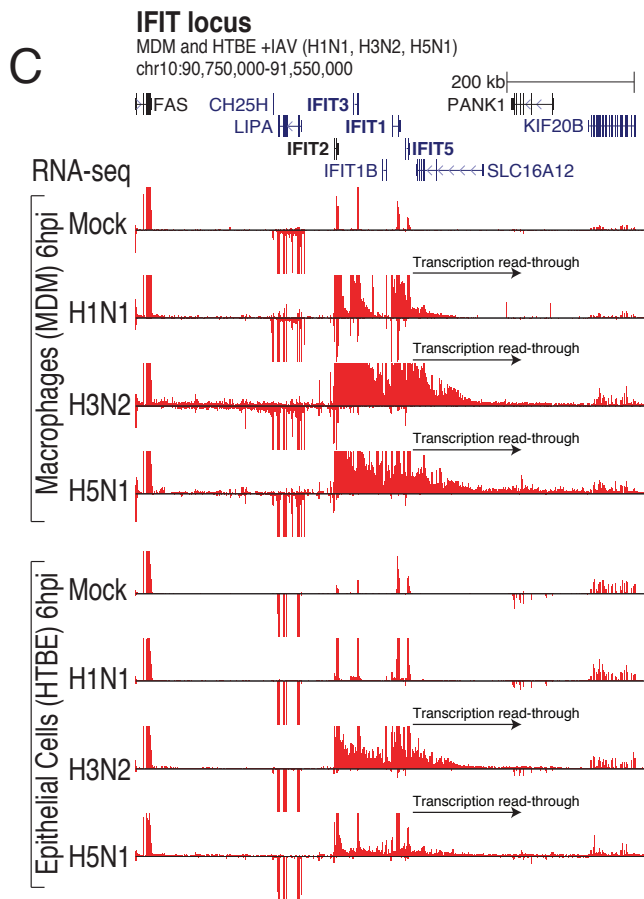

Supplement: NIHMS1502830-supplement-7.pdf [file NIHMS1502830-supplement-7.pdf]
